# Supplementary material for: A comprehensive analysis of malaria transmission in Brazil
Source: Pathog Glob Health. 2019 Mar 4;113(1):1–13. doi: 10.1080/20477724.2019.1581463 (PMC6425916; doi:10.1080/20477724.2019.1581463)
Supplement: Supplemental Material [file YPGH_A_1581463_SM0929.xlsx]

## Sheet: Distribution 
Map	Brazilian Regions	North							Northeast									Midwest				Southeast				South
Number	Species\States	AC	AM	AP	PA	RO	RR	TO	AL	BA	CE	MA	PB	PE	PI	RN	SE	DF	GO	MT	MS	ES	MG	RJ	SP	PR	RS	SC
1	An. albertoi																						Bourke et al. 2013, Foster et al. 2013; Motoki et al. 2011		Bourke et al. 2013,
2	An. albitarsis s.l.	Deane et al. 1948; dos Reis et al. 2015; Marrelli et al. 2005; Moutinho et al. 2011	Deane et al. 1948, 1971; Martins-Campos et al. 2012; Rafael et al. 2006; Rios-Veslásquez et al. 2013; Ruiz-Lopes et al. 2012(G); Tadei & Thatcher 2000	Barbosa et al. 2014; Deane et al. 1948, 1971; Póvoa et al. 2001; Santos et al. 2003	de Arruda et al. 1986; da Rocha et al. 2008; Deane et al. 1948; Ruiz-Lopes et al. 2012(G); Silva et al. 2006; Santos et al. 2009;	Deane et al. 1948; Gil et al. 2015; Klein et al. 1991; Lourenço-de-Oliveira et al. 1989; Marrelli et al. 2005; Oliveira-Ferreira et al. 1990; Ruiz-Lopes et al. 2012(H); Souza-Santos 2002	Barros et al. 2006, 2010; Deane et al. 1948; Nagm et al. 2007; Silva-Vasconcelos et al. 2002		Deane et al. 1948	Motoki et al. 2009; Ruiz-Lopes et al. 2012(G)	Deane et al. 1948	Deane et al. 1948; Rebêlo et al. 2007; Xavier & Rebêlo 1999	Deane et al. 1948	Deane et al. 1948	Deane et al. 1948	Deane et al. 1948			Guimarães et al. 2004; Melandri et al. 2015	Gomes et al. 2010b; Ribeiro et al. 2013; Ruiz-Lopes et al. 2012(H); dos Santos Silva et al. 2012	Gomes et al. 2010a	Meneguzzi et al. 2009; Natal et al. 2007; Rezende et al. 2009	Foster et al. 2013; Limongi et al. 2008; Santos et al. 2015; Tubaki et al. 2004#	Alencar et al. 2012; Flores-Mendoza & Lourenço-de-Oliveira 1996; Silva et al. 2014	Bourke at al. 2010; Forattini 1987; Forattini et al. 1995; Foster et al. 2013; Gomes et al. 2010a, 2010b; Lehr et al. 2005; Motoki et al. 2009; Rafael et al. 2006; Ruiz-Lopes et al. 2012; Santos et al. 2002; Tubaki et al. 2004#; Wilkerson et al. 1995b	Guimarães et al. 1997, 2003; Li & Wilkerson 2005; Motoki et al. 2009; Ruiz-Lopes et al. 2012; dos Santos Silva et al. 2012; Wilkerson et al. 1995b	Cardoso et al. 2005	Lehr et al. 2005; Motoki et al. 2009; Ruiz-Lopes et al. 2012; Wilkerson et al. 1995b
3	An. antunesi											Rebêlo et al. 2007												Bourke et al. 2011; Foster et al. 2013; Nagaki et al. 2010	Bourke at al. 2010, 2011; Deane et al. 1971; Forattini et al. 1997; Foster et al. 2013; Nagaki et al. 2010		Cardoso et al. 2005	Coutinho et al. 1944; Deane et al. 1971
4	An. aquasalis			Deane et al. 1948; Fairley et al. 2002	de Arruda et al. 1986; Deane et al. 1948; Fairley et al. 2002; Silva et al. 2006				Deane et al. 1948		Deane et al. 1948	Deane et al. 1948; Rebêlo et al. 2007; Xavier & Rebêlo 1999	Deane et al. 1948	Deane et al. 1948	C	Deane et al. 1948	Flores-Mendoza et al. 1996R					Meneguzzi et al. 2009		Alencar et al. 2012; Flores-Mendoza et al. 1996; Flores-Mendoza & Lourenço-de-Oliveira 1996; Silva et al. 2014	Flores-Mendoza et al. 1996R
5	An. argyritarsis	dos Reis et al. 2015; Moutinho et al. 2011	Martins-Campos et al. 2012	Póvoa et al. 2001	Deane et al. 1948; Rodrigues et al. 2014	Lourenço-de-Oliveira et al. 1989; Oliveira-Ferreira et al. 1990	Deane et al. 1948		Deane et al. 1948		Deane et al. 1948; Foster et al. 2013	Deane et al. 1948; Rebêlo et al. 2007	Deane et al. 1948	Deane et al. 1948	Deane et al. 1948	Deane et al. 1948	Marteis et al. 2015			Silva et al. 2008		Meneguzzi et al. 2009; Rezende et al. 2009	Alencar et al. 2012; Bourke at al. 2010; Foster et al. 2013; Santos et al. 2015; Tubaki et al. 2004#	Alencar et al. 2012, 2013; Silva et al. 2014	Gomes et al. 2010a;Tubaki et al. 2004#		Cardoso et al. 2005	Coutinho et al. 1944
6	An. arthuri					Bourke et al. 2013, Foster et al. 2013; Motoki et al. 2011					Bourke et al. 2013,								Bourke et al. 2013,				Bourke et al. 2013, Foster et al. 2013		Bourke et al. 2013, Foster et al. 2013
7	An. benarrochi	Deane et al. 1948; Foster et al. 2013	Deane et al. 1948;		Rodrigues et al. 2014	Charlwood & Alecrim 1989; Deane et al. 1948; Gil et al. 2015; Lourenço-de-Oliveira et al. 1989; Marrelli et al. 2005; Moroni et al. 2010						Rebêlo et al. 2007?								Missawa et al. 2011; Ribeiro et al. 2013		Meneguzzi et al. 2009
8	An. braziliensis(S)	Deane et al. 1948; dos Reis et al. 2015; Moutinho et al. 2011	Deane et al. 1948; Martins-Campos et al. 2012; Tadei & Thatcher 2000	Barbosa et al. 2014, 2016; Bourke at al. 2010; Deane et al. 1948, 1971; Foster et al. 2013; Galardo et al. 2007; Lehr et al. 2005; Póvoa et al. 2001; Voorham 2002	de Arruda et al. 1986; Deane et al. 1948; Silva et al. 2006; Santos et al. 2009	Deane et al. 1948; Gil et al. 2015; Klein et al. 1991; Lourenço-de-Oliveira et al. 1989; Marrelli et al. 2005; Morais et al. 2012; Oliveira-Ferreira et al. 1990; Souza-Santos 2002	Barros et al. 2010; Deane et al. 1948; Nagm et al. 2007; Póvoa et al. 2006; Silva-Vasconcelos et al. 2002		Deane et al. 1948		Deane et al. 1948	Deane et al. 1948; Rebêlo et al. 2007	Deane et al. 1948	Deane et al. 1948		Deane et al. 1948				Gomes et al. 2010b	Gomes et al. 2010a		Santos et al. 2015		Bourke at al. 2010; Foster et al. 2013; Gomes et al. 2010a					Subgenus
9	An. darlingi	Almeida et al. 2014; Bourke at al. 2010; Branquinho et al. 1993; Deane et al. 1948; dos Reis et al. 2015; Emerson et al. 2015; Foster et al. 2013; Marrelli et al. 2005; Moutinho et al. 2011; Pedro et al. 2010	Conn 1998; Deane et al. 1948, 1971; Emerson et al. 2015; Lourenço-de-Oliveira & Luz 1996; Martins-Campos et al. 2012; Moroni et al. 2010; Motoki et al. 2012; Rios-Veslásquez et al. 2013; Scarpassa & Conn 2011; Tadei & Thatcher 2000	Almeida et al. 2014; Barbosa et al. 2014, 2016; Bourke at al. 2010; Conn 1998; Conn et al. 2002; Deane et al. 1948, 1971; Emerson et al. 2015; Foster et al. 2013; Galardo et al. 2007; Lehr et al. 2005; Moroni et al. 2010; Motoki et al. 2012; Pedro et al. 2010; Póvoa et al. 2001; Santos et al. 2003; Voorham 2002; Zimmerman et al. 2006, 2013	Almeida et al. 2014; de Arruda et al. 1986; Conn 1998; da Rocha et al. 2008; Deane et al. 1948; Emerson et al. 2015; Motoki et al. 2012; Silva et al. 2006; Santos et al. 2009	Almeida et al. 2014; Charlwood & Alecrim 1989; Conn 1998; Deane et al. 1948; Emerson et al. 2015; Gil et al. 2007, 2015; Klein et al. 1991; Lourenço-de-Oliveira et al. 1989; Lourenço-de-Oliveira & Luz 1996; Marrelli et al. 2005; Morais et al. 2012; Oliveira-Ferreira et al. 1990; Rodrigues et al. 2014; Souza-Santos 2002	Barros et al. 2006, 2010; Conn 1998; Deane et al. 1948; Nagm et al. 2007; Póvoa et al. 2006; Silva-Vasconcelos et al. 2002;	Almeida et al. 2014; Emerson et al. 2015; Motoki et al. 2012	Deane et al. 1948		Deane et al. 1948	Deane et al. 1948; Rebêlo et al. 2007			Deane et al. 1948				Guimarães et al. 2004; Melandri et al. 2015; Motoki et al. 2012	Conn 1998; Emerson et al. 2015; Missawa et al. 2011; Motoki et al. 2012; Pedro et al. 2010; Ribeiro et al. 2013	Gomes et al. 2010a	Almeida et al. 2014; Emerson et al. 2015; Meneguzzi et al. 2009; Motoki et al. 2012; Natal et al. 2007; Pedro et al. 2010	Emerson et al. 2015; Limongi et al. 2008; Pedro et al. 2010; Santos et al. 2015; Tubaki et al. 2004#	Almeida et al. 2014; Emerson et al. 2015; Motoki et al. 2012; Pedro et al. 2010	Almeida et al. 2014; Conn 1998; Emerson et al. 2015; Forattini 1987; Gomes et al. 2010a; Motoki et al. 2012; Pedro et al. 2010; Tubaki et al. 2004#	Almeida et al. 2014; Emerson et al. 2015; Motoki et al. 2012; Pedro et al. 2010				Nyssorhynchus
10	An. deaneorum	Bourke at al. 2010; Branquinho et al. 1993; dos Reis et al. 2015; Foster et al. 2013; Marrelli et al. 2005; Moutinho et al. 2011; Ruiz-Lopes et al. 2012	Martins-Campos et al. 2012			Gil et al. 2015; Klein et al. 1991; Li & Wilkerson 2005; Lima et al. 2004; Morais et al. 2012; Motoki et al. 2009; Ruiz-Lopes et al. 2012; Wilkerson et al. 1995b														Lehr et al. 2005; Ruiz-Lopes et al. 2012	Foster et al. 2013; Gomes et al. 2010a		Santos et al. 2015		Gomes et al. 2010a	Motoki et al. 2009; Ruiz-Lopes et al. 2012; Wilkerson et al. 1995b				Stethomyia
11	An. dunhami	Marrelli et al. 2005	Bourke at al. 2010; Calado et al. 2008; Deane et al. 1948; Foster et al. 2013; Lounibos et al. 1997; Scarpassa & Conn 2011; Trindade & Scarpassa 2002		Scarpassa & Conn 2011	Scarpassa & Conn 2011	Nagm et al. 2007*																							Anopheles
12	An. evansae		Lourenço-de-Oliveira & Luz 1996; Martins-Campos et al. 2012	Póvoa et al. 2001	Rodrigues et al. 2014; Silva et al. 2006	Gil et al. 2007; Lourenço-de-Oliveira et al. 1989; Marrelli et al. 2005; Oliveira-Ferreira et al. 1990; Souza-Santos 2002	Barros et al. 2010; Nagm et al. 2007					Rebêlo et al. 2007; Xavier & Rebêlo 1999							Guimarães et al. 2004; Melandri et al. 2015	Gomes et al. 2010b; dos Santos Silva et al. 2012	Gomes et al. 2010a	Meneguzzi et al. 2009; Rezende et al. 2009	Alencar et al. 2012; Santos et al. 2015; Tubaki et al. 2004#	Alencar et al. 2012; Silva et al. 2014; Wermelinger et al. 2012	Bourke at al. 2010; Forattini 1987; Forattini et al. 1995; Foster et al. 2013; Gomes et al. 2010a, 2010b; Tubaki et al. 2004#	Foster et al. 2013; Guimarães et al. 1997, 2003; dos Santos Silva et al. 2012	Cardoso et al. 2005			Kerteszia
13	An. galvaoi	Deane et al. 1948; dos Reis et al. 2015	Lourenço-de-Oliveira & Luz 1996		de Arruda et al. 1986	Charlwood & Alecrim 1989; Deane et al. 1948; Lourenço-de-Oliveira et al. 1989; Oliveira-Ferreira et al. 1990						Rebêlo et al. 2007; Xavier & Rebêlo 1999								Gomes et al. 2010b	Gomes et al. 2010a	Meneguzzi et al. 2009; Rezende et al. 2009	Alencar et al. 2012; Tubaki et al. 2004#		Bourke at al. 2010; Forattini 1987; Forattini et al. 1995; Foster et al. 2013; Gomes et al. 2010a, 2010b; Laporta et al. 2015; Sallum et al. 2002; Tubaki et al. 2004#	Foster et al. 2013; Guimarães et al. 1997; Guimarães et al. 2003				Lophopodomyia
14	An. goeldii		Bourke at al. 2010; Calado et al. 2008; Foster et al. 2013	Calado et al. 2008	Bourke at al. 2010; Calado et al. 2008; Foster et al. 2013; McKeon et al. 2013		McKeon et al. 2013
15	An. guarani																									Bourke et al. 2011; Foster et al. 2013; Nagaki et al. 2011
16	An. halophylus																				Silva-do-Nascimento et al. 2011									* The author was in doubt between two species
17	An. ininii						Póvoa et al. 2006																							? Maybe it is the described specie, but the author is sure only about genus
18	An. janconnae			Ruiz-Lopes et al. 2012	Ruiz-Lopes et al. 2012		McKeon et al. 2013; Motoki et al. 2009; Ruiz-Lopes et al. 2012																							# SP and MG border
19	An. konderi	Deane et al. 1948; Foster et al. 2013; Scarpassa & Conn 2006	Deane et al. 1948; Scarpassa & Conn 2006	Bourke at al. 2010; Deane et al. 1948; Foster et al. 2013; Ruiz-Lopes et al. 2013	Deane et al. 1948	Deane et al. 1948; Foster et al. 2013; Gil et al. 2007, 2015; Morais et al. 2012*; Scarpassa & Conn 2006																				Foster et al. 2013; Motoki et al. 2011				R: revised by the author (references not available)
20	An. lanei																			Ribeiro et al. 2013		Meneguzzi et al. 2009; Rezende et al. 2009			Bourke at al. 2010; Foster et al. 2013; Senise & Sallum 2007					S: Synonymous of An. pessoai
21	An. lutzii																			Ribeiro et al. 2013		Deane et al. 1971; Meneguzzi et al. 2009; Rezende et al. 2009	Alencar et al. 2012; Tubaki et al. 2004#		Bourke at al. 2010, 2011; Deane et al. 1971; Duarte et al. 2013; Forattini et al. 1995; Foster et al. 2013; Guimarães et al. 2001; Nagaki et al. 2011; Tubaki et al. 2004#	Guimarães et al. 2003; Nagaki et al. 2011	Bourke et al. 2011; Foster et al. 2013; Cardoso et al. 2005	Coutinho et al. 1944; Deane et al. 1971		C: confliting information (Deane et al. 1948)
22	An. marajoara		Lehr et al. 2005; Li & Wilkerson 2005; Moroni et al. 2010; Motoki et al. 2009; Ruiz-Lopes et al. 2012; Wilkerson et al. 1995b	Barbosa et al. 2016; Bourke at al. 2010; Conn et al. 2002; Foster et al. 2013; Galardo et al. 2007; Li & Wilkerson 2005; Moroni et al. 2010; Ruiz-Lopes et al. 2012; Voorham 2002; Zimmerman et al. 2006, 2013	Foster et al. 2013; Li & Wilkerson 2005; McKeon et al. 2013; Motoki et al. 2009; Ruiz-Lopes et al. 2012; Wilkerson et al. 1995b	Lehr et al. 2005; Lourenço-de-Oliveira & Luz 1996; Morais et al. 2012; Ruiz-Lopes et al. 2012; Wilkerson et al. 1995b	Lehr et al. 2005; Li & Wilkerson 2005; Moroni et al. 2010													Lehr et al. 2005; Motoki et al. 2009; Ruiz-Lopes et al. 2012; Wilkerson et al. 1995b					Kakitani et al. 2003; Motoki et al. 2009; Wilkerson et al. 1995b
23	An. nigritarsis																			Missawa et al. 2011
24	An. noroestensis								Deane et al. 1948		Deane et al. 1948	Deane et al. 1948	Deane et al. 1948	Deane et al. 1948	Deane et al. 1948	Deane et al. 1948									Deane et al. 197
25	An. nunesztovari s.l.	Deane et al. 1948; Marrelli et al. 2005	Deane et al. 1948, 1971; Martins-Campos et al. 2012; Mirabello & Conn 2008; Lourenço-de-Oliveira & Luz 1996; Moroni et al. 2010; Rios-Veslásquez et al. 2013; Scarpassa & Conn 2011; Tadei & Thatcher 2000; Trindade & Scarpassa 2002	Barbosa et al. 2014, 2016; Deane et al. 1948, 1971; Galardo et al. 2007; Mirabello & Conn 2008; Póvoa et al. 2001; Scarpassa & Conn 2011; Voorham 2002; Zimmerman et al. 2006, 2013	de Arruda et al. 1986; da Rocha et al. 2008; Deane et al. 1948; Mirabello & Conn 2008; Rodrigues et al. 2014; Silva et al. 2006; Santos et al. 2009; Scarpassa & Conn 2011	Charlwood & Alecrim 1989; Deane et al. 1948; Foster et al. 2013; Gil et al. 2007; Klein et al. 1991; Lourenço-de-Oliveira et al. 1989; Lourenço-de-Oliveira & Luz 1996; Mirabello & Conn 2008; Morais et al. 2012; Oliveira-Ferreira et al. 1990; Scarpassa & Conn 2011; Souza-Santos 2002	Barros et al. 2010; Deane et al. 1948; Mirabello & Conn 2008; Nagm et al. 2007*; Póvoa et al. 2006; Silva-Vasconcelos et al. 2002					Deane et al. 1948; Rebêlo et al. 2007; Xavier & Rebêlo 1999			Deane et al. 1948							Meneguzzi et al. 2009	Tubaki et al. 2004#		Tubaki et al. 2004#
26	An. oryzalimnetes				Lehr et al. 2005; McKeon et al. 2013; Motoki et al. 2009; Ruiz-Lopes et al. 2012; Wilkerson et al. 1995b	Ruiz-Lopes et al. 2012				Lehr et al. 2005; Motoki et al. 2009; Ruiz-Lopes et al. 2012; Wilkerson et al. 1995b	Lehr et al. 2005; Li & Wilkerson 2005; Motoki et al. 2009; Ruiz-Lopes et al. 2012; Wilkerson et al. 1995b						Marteis et al. 2015			Motoki et al. 2009; Ruiz-Lopes et al. 2012; Wilkerson et al. 1995b		Motoki et al. 2009; Ruiz-Lopes et al. 2012; Wilkerson et al. 1995b		Motoki et al. 2009; Ruiz-Lopes et al. 2012; Wilkerson et al. 1995b	Bourke at al. 2010; Forattini et al. 1995; Foster et al. 2013; Lehr et al. 2005; Li & Wilkerson 2005; Motoki et al. 2009; Ruiz-Lopes et al. 2012; Santos et al. 2002; Wilkerson et al. 1995b	Motoki et al. 2009; Wilkerson et al. 1995b
27	An. oswaldoi s.l.	Branquinho et al. 1993; Deane et al. 1948; Foster et al. 2013; Marrelli et al. 1999, 2005; Scarpassa & Conn 2006	Deane et al. 1948, 1971; Lourenço-de-Oliveira & Luz 1996; Marrelli et al. 1999; Martins-Campos et al. 2012; Ruiz-Lopes et al. 2013	Barbosa et al. 2016; Deane et al. 1948, 1971; Galardo et al. 2007; Marrelli et al. 1999; Póvoa et al. 2001; Voorham 2002; Zimmerman et al. 2006	de Arruda et al. 1986; da Rocha et al. 2008; Deane et al. 1948; Silva et al. 2006; Foster et al. 2013; Lounibos et al. 1997; Santos et al. 2009; Scarpassa & Conn 2006	Charlwood & Alecrim 1989; Deane et al. 1948; Klein et al. 1991; Lourenço-de-Oliveira et al. 1989; Lourenço-de-Oliveira & Luz 1996; Marrelli et al. 1999, 2005; Morais et al. 2012*; Moroni et al. 2010; Oliveira-Ferreira et al. 1990; Ruiz-Lopes et al. 2013; Scarpassa & Conn 2006; Souza-Santos 2002	Barros et al. 2006, 2010; Deane et al. 1948; Nagm et al. 2007; Póvoa et al. 2006; Silva-Vasconcelos et al. 2002		Deane et al. 1948			Deane et al. 1948; Rebêlo et al. 2007			Deane et al. 1948				Guimarães et al. 2004; Melandri et al. 2015	Gomes et al. 2010b; Missawa et al. 2011; Ruiz-Lopes et al. 2013	Gomes et al. 2010a	Bourke at al. 2010; Deane et al. 1971; Foster et al. 2013; Marrelli et al. 1999; Meneguzzi et al. 2009; Natal et al. 2007; Ruiz-Lopes et al. 2013	Tubaki et al. 2004#	Ruiz-Lopes et al. 2013	Bourke at al. 2010; Forattini 1987; Forattini et al. 1995; Foster et al. 2013; Gomes et al. 2010a, 2010b; Ruiz-Lopes et al. 2013; Tubaki et al. 2004#
28	An. parvus										Deane et al. 1948								Bourke et al. 2011; Foster et al. 2013		Gomes et al. 2010a	Deane et al. 1971; Meneguzzi et al. 2009; Rezende et al. 2009	Bourke at al. 2010, 2011; Foster et al. 2013; Limongi et al. 2008; Tubaki et al. 2004#		Deane et al. 1971; Forattini et al. 1995; Tubaki et al. 2004#	Bourke at al. 2010, 2011; Foster et al. 2013	Cardoso et al. 2005
29	An. pristinus																								Bourke et al. 2011; Foster et al. 2013; Nagaki et al. 2010
30	An. rangeli	Bourke at al. 2010; Deane et al. 1948; Foster et al. 2013; Marrelli et al. 2005; Moutinho et al. 2011; Trindade & Scarpassa 2002	Deane et al. 1948;	Póvoa et al. 2001		Charlwood & Alecrim 1989; Deane et al. 1948; Gil et al. 2007; Foster et al. 2013; Lourenço-de-Oliveira et al. 1989; Moroni et al. 2010; Oliveira-Ferreira et al. 1990; Souza-Santos 2002	C					Rebêlo et al. 2007								Missawa et al. 2011			Alencar et al. 2012	Alencar et al. 2012; Silva et al. 2014; Wermelinger et al. 2012
31	An. rondoni	Deane et al. 1948; dos Reis et al. 2015	Deane et al. 1948		da Rocha et al. 2008	Deane et al. 1948; Klein et al. 1991						Rebêlo et al. 2007								Gomes et al. 2010b; Wilkerson et al. 1995a	Gomes et al. 2010a				Forattini 1987; Gomes et al. 2010a, 2010b	Bourke at al. 2010; Foster et al. 2013; Guimarães et al. 1997	Cardoso et al. 2005
32	An. sawyeri										Deane et al. 1948						Marteis et al. 2015
33	An. strodei				da Rocha et al. 2008; Silva et al. 2006	Charlwood & Alecrim 1989; Lourenço-de-Oliveira et al. 1989; Oliveira-Ferreira et al. 1990	Barros et al. 2006, 2010; Nagm et al. 2007			Bourke et al. 2013,	Deane et al. 1948	Deane et al. 1948; Rebêlo et al. 2007			Deane et al. 1948	Deane et al. 1948				Gomes et al. 2010b	Gomes et al. 2010a	Bourke et al. 2010, 2013; Deane et al. 1971; Foster et al. 2013; Meneguzzi et al. 2009; Motoki et al. 2011; Rezende et al. 2009	Alencar et al. 2012; Bourke et al. 2013, Foster et al. 2013; Tubaki et al. 2004#	Alencar et al. 2012; Silva et al. 2014	Deane et al. 1971; Bourke et al. 2010, 2013; Duarte et al. 2013; Forattini 1987; Forattini et al. 1995; Foster et al. 2013; Gomes et al. 2010a, 2010b; Laporta et al. 2015; Neves et al. 2013; Tubaki et al. 2004#	Bourke et al. 2010, 2013; Foster et al. 2013; Guimarães et al. 2003	Bourke et al. 2013; Cardoso et al. 2005	Coutinho et al. 1944; Coutinho & Rachou, 1966
34	An. triannulatus s.l.	Bourke at al. 2010; Branquinho et al. 1993; Deane et al. 1948; dos Reis et al. 2015; Foster et al. 2013; Moutinho et al. 2011; Pedro et al. 2010	Deane et al. 1948, 1971; Lourenço-de-Oliveira & Luz 1996; Martins-Campos et al. 2012; Rios-Veslásquez et al. 2013; Tadei & Thatcher 2000	Barbosa et al. 2014, 2016; Bourke at al. 2010; Deane et al. 1948, 1971; Foster et al. 2013; Galardo et al. 2007; Moroni et al. 2010; Pedro et al. 2010; Póvoa et al. 2001; Santos et al. 2003; Voorham 2002; Zimmerman et al. 2006, 2013	de Arruda et al. 1986; da Rocha et al. 2008; Deane et al. 1948; Silva et al. 2006; Santos et al. 2009; McKeon et al. 2013; Pedro et al. 2010; Rodrigues et al. 2014	Charlwood & Alecrim 1989; Deane et al. 1948; Gil et al. 2007, 2015; Klein et al. 1991; Lounibos et al. 1997; Lourenço-de-Oliveira et al. 1989; Lourenço-de-Oliveira & Luz 1996; Marrelli et al. 2005; Morais et al. 2012; Oliveira-Ferreira et al. 1990; Pedro et al. 2010; Souza-Santos 2002	Barros et al. 2010; Deane et al. 1948, McKeon et al. 2013; Nagm et al. 2007; Póvoa et al. 2006		Deane et al. 1948		Deane et al. 1948	Deane et al. 1948; Rebêlo et al. 2007; Xavier & Rebêlo 1999	Deane et al. 1948	Deane et al. 1948	Deane et al. 1948	Deane et al. 1948	Marteis et al. 2015		Guimarães et al. 2004; Melandri et al. 2015	Gomes et al. 2010b; Lounibos et al. 1997; Missawa et al. 2011; Ribeiro et al. 2013	Gomes et al. 2010a; Silva-do-Nascimento et al. 2011	Bourke at al. 2010; Foster et al. 2013; Meneguzzi et al. 2009; Natal et al. 2007; Pedro et al. 2010	Foster et al. 2013; Limongi et al. 2008; Pedro et al. 2010; Santos et al. 2015	Alencar et al. 2012; Silva et al. 2014; Pedro et al. 2010	Bourke at al. 2010; Duarte et al. 2013; Forattini 1987; Forattini et al. 1995; Foster et al. 2013; Gomes et al. 2010a, 2010b; Laporta et al. 2015; Pedro et al. 2010	Guimarães et al. 1997; Guimarães et al. 2003; Pedro et al. 2010	Cardoso et al. 2005
35	An. kompi	Deane et al. 1948	Deane et al. 1948		Deane et al. 1948				Deane et al. 1948		Deane et al. 1948		Deane et al. 1948									Deane et al. 1971; Natal et al. 2007*			Foster et al. 2013
36	An. nimbus		Deane et al. 1948	Deane et al. 1948	Confalonieri & Costa Neto 2012; Deane et al. 1948	Deane et al. 1948; Lourenço-de-Oliveira et al. 1989; Lourenço-de-Oliveira & Luz 1996						Deane et al. 1948												Silva et al. 2014
37	An. thomasi		Deane et al. 1948		Deane et al. 1948
38	An. gilesi					Morais et al. 2012					Deane et al. 1948											Meneguzzi et al. 2009	Tubaki et al. 2004#		Tubaki et al. 2004#
39	An. pseudotibiamaculatus
40	An. squamifemur				Santos et al. 2009	Deane et al. 1948
41	An. anchietai
42	An. bustamentei
43	An. costai					Morais et al. 2012																Meneguzzi et al. 2009; Natal et al. 2007			Neves et al. 2013*
44	An. eiseni	Deane et al. 1948	Deane et al. 1948		Deane et al. 1948	Marrelli et al. 2005					Deane et al. 1948	Rebêlo et al. 2007												Silva et al. 2014
45	An. evandroi
46	An. fluminensis	Deane et al. 1948				Lourenço-de-Oliveira et al. 1989					Deane et al. 1948											Deane et al. 1971	Alencar et al. 2012	Alencar et al. 2012	de Carvalho et al. 2013; Guimarães et al. 2001; Neves et al. 2013	Guimarães et al. 2003	Cardoso et al. 2005
47	An. forattinii			Barbosa et al. 2014*, 2016*																					Neves et al. 2013*
48	An. intermedius	Deane et al. 1948	Deane et al. 1948, 1971	Barbosa et al. 2014, 2016; Deane et al. 1948, 1971; Galardo et al. 2007; Moroni et al. 2010; Póvoa et al. 2001; Santos et al. 2003; Zimmerman et al. 2006, 2013	de Arruda et al. 1986; Deane et al. 1948, Silva et al. 2006; Santos et al. 2009	Deane et al. 1948; Lourenço-de-Oliveira et al. 1989			Deane et al. 1948			Deane et al. 1948; Rebêlo et al. 2007	Deane et al. 1948	Deane et al. 1948								Deane et al. 1971; Meneguzzi et al. 2009		Silva et al. 2014	Deane et al. 1971; Bourke at al. 2010; Foster et al. 2013; Neves et al. 2013*			Coutinho & Rachou, 1966
49	An. maculipes											Rebêlo et al. 2007										Meneguzzi et al. 2009			Duarte et al. 2013*; Neves et al. 2013*		Cardoso et al. 2005	Coutinho & Rachou, 1966
50	An. mattogrossensis	Deane et al. 1948	Deane et al. 1948, 1971; Lourenço-de-Oliveira & Luz 1996; Martins-Campos et al. 2012; Moroni et al. 2010; Santos et al. 2003; Tadei & Thatcher 2000	Deane et al. 1948; Galardo et al. 2007; Zimmerman et al. 2006	Deane et al. 1948; Santos et al. 2009	Deane et al. 1948; Gil et al. 2007; Klein et al. 1991; Lourenço-de-Oliveira et al. 1989; Marrelli et al. 2005	Barros et al. 2006, 2010; Deane et al. 1948													Ribeiro et al. 2013								Coutinho & Rachou, 1966
51	An. mediopunctatus	Deane et al. 1948	Deane et al. 1948, 1971; Lourenço-de-Oliveira & Luz 1996; Martins-Campos et al. 2012; Tadei & Thatcher 2000	Barbosa et al. 2014*, 2016*; Deane et al. 1948, 1971; Póvoa et al. 2001	de Arruda et al. 1986; Confalonieri & Costa Neto 2012; Deane et al. 1948; Silva et al. 2006; Santos et al. 2009	Deane et al. 1948; Gil et al. 2007; Klein et al. 1991; Lourenço-de-Oliveira et al. 1989; Lourenço-de-Oliveira & Luz 1996; Marrelli et al. 2005; Oliveira-Ferreira et al. 1990	Barros et al. 2010		Deane et al. 1948		Deane et al. 1948	Deane et al. 1948								Missawa et al. 2011		Deane et al. 1971; Rezende et al. 2009	Alencar et al. 2012		Neves et al. 2013*	Guimarães et al. 2003
52	An. minor			Deane et al. 1948, 1971; Póvoa et al. 2001	de Arruda et al. 1986; Deane et al. 1948; Santos et al. 2009	Klein et al. 1991; Lourenço-de-Oliveira et al. 1989			Deane et al. 1948			Rebêlo et al. 2007	Deane et al. 1948	Deane et al. 1948								Bourke at al. 2010; Meneguzzi et al. 2009; Natal et al. 2007
53	An. neomaculipalpus	Deane et al. 1948				Deane et al. 1948
54	An. peryassui	Deane et al. 1948	Deane et al. 1948; Lourenço-de-Oliveira & Luz 1996; Martins-Campos et al. 2012; Tadei & Thatcher 2000	Barbosa et al. 2014, 2016; Deane et al. 1948, 1971; Galardo et al. 2007; Póvoa et al. 2001	de Arruda et al. 1986; Confalonieri & Costa Neto 2012; Deane et al. 1948; Silva et al. 2006; Santos et al. 2009	Charlwood & Alecrim 1989; Deane et al. 1948; Gil et al. 2007; Klein et al. 1991; Lourenço-de-Oliveira et al. 1989; Marrelli et al. 2005; Morais et al. 2012	Barros et al. 2010; Deane et al. 1948; Póvoa et al. 2006; Silva-Vasconcelos et al. 2002		Deane et al. 1948			Deane et al. 1948; Rebêlo et al. 2007*	Deane et al. 1948	Deane et al. 1948		Deane et al. 1948				Gomes et al. 2010b; Missawa et al. 2011	Gomes et al. 2010a			Lorosa et al. 2010	Gomes et al. 2010b
55	An. pseudomaculipes											Rebêlo et al. 2007													Duarte et al. 2013*; Neves et al. 2013*
56	An. pseudipunctipennis
57	An. punctimacula	Deane et al. 1948	Martins-Campos et al. 2012		Deane et al. 1948
58	An. ranchoui
59	An. shannoni		Deane et al. 1948, 1971; Lourenço-de-Oliveira & Luz 1996	Deane et al. 1971	Deane et al. 1948; Silva et al. 2006	Deane et al. 1948; Lourenço-de-Oliveira & Luz 1996						Rebêlo et al. 2007
60	An. tibiamaculatus																					Meneguzzi et al. 2009				Guimarães et al. 2003		Deane et al. 1971
61	An. bambusicolus
62	An. bellator									Aragão 1964; Carvalho-Pinto & Lourenço-de-Oliveira 2003; Zavortink 1973			Aragão 1964; Zavortink 1973	Aragão 1964; Zavortink 1973								Andrade & Brandão 1957; Aragão 1964; Meneguzzi et al. 2009; Zavortink 1973		Aragão 1964; Carvalho & Rachou 1950; Zavortink 1973	Aragão 1964; Carvalho-Pinto & Lourenço-de-Oliveira 2003; Chaves et al. 2016; Coutinho 1947; Duarte et al. 2013; Forattini et al 1961; Gomes et al. 1987; Forattini et al. 1986a, 1986b, 1993, 1996, 1998, 1999, 2000; Laporta et al. 2011; Ueno et al. 2007; Zavortink 1973,	Amaral 1942; Aragão 1964; Coutinho et al. 1943; Guedes & Navarro-Silva 2014; Zavortink 1973	Aragão 1964; Cardoso et al. 2005; Zavortink 1973	Aragão 1964; Carvalho-Pinto & Lourenço-de-Oliveira 2003; Coutinho et al. 1944; Coutinho & Rachou 1966; Portes et al. 2010; Rachou & Ferreira 1966; Zavortink 1973
63	An. boliviensis
64	An. cruzii					Souza-Santos 2002				Aragão 1964; Carvalho-Pinto & Lourenço-de-Oliveira 2004; Rona et al. 2009; Wilkerson & Peyton 1991; Zavortink 1973				Aragão 1964; Wilkerson & Peyton 1991; Zavortink 1973,			Aragão 1964; Wilkerson & Peyton 1991; Zavortink 1973					Andrade & Brandão 1957; Aragão 1964; Deane et al. 1971; Meneguzzi et al. 2009; Rezende et al. 2009*; Rezende et al. 2013; Rona et al. 2009; Wilkerson & Peyton 1991; Zavortink 1973		Aragão 1964; Carvalho-Pinto & Lourenço-de-Oliveira 2004; Guimarães & Arlé 1984; Guimarães et al. 1985; Guimarães & Victório 1986; Rona et al. 2009; dos Santos Silva et al. 2012, 2014; Wilkerson & Peyton 1991; Zavortink 1973	Branquinho et al. 1997; Carreri-Bruno et al. 1995; Carvalho-Pinto & Lourenço-de-Oliveira 2004; Chaves et al. 2016; Corrêa 1943, 1961; Deane et al. 1966, 1970, 1971; Duarte et al. 2013; Forattini et al. 1968, 1986a, 1986b, 1993, 1996, 2000; Foster et al. 2013; Guimarães et al. 2001; Guimarães et al. 2000, 2012; Gomes et al. 1987; Laporta et al. 2011, 2015; Lorenz et al. 2014; Lutz 1903; Marques et…	Amaral 1942; Aragão 1964; Coutinho et al. 1943; Dalla Bona & Navarro-Silva 2006, 2010; Guedes & Navarro-Silva 2014; Guimarães et al., 2003; Wilkerson & Peyton 1991; Zavortink 1973	Aragão 1964, Cardoso et al. 2005; Wilkerson & Peyton 1991; Zavortink 1973	Aragão 1964; Carvalho-Pinto & Lourenço-de-Oliveira 2004; Coutinho et al. 1944, Coutinho & Rachou 1966; Deane et al. 1971; Marcondes & Paterno 2005; Portes et al. 2010; Rachou 1966; Rachou & Ferreira 1966; Rona et al. 2009; Wilkerson & Peyton 1991; Zavortink 1973
65	An. homunculus									Cardoso et al. 2012												Rezende et al. 2009*			Aragão 1964; Marques et al. 2012; Zavortink 1973	Zavortink 1973	Cardoso et al. 2012	Aragão 1964; Portes et al. 2010; Rachou & Ferreira 1966; Veloso 1956; Zavortink 1973
66	An. laneanus																							Zavortink 1973	Aragão 1964; Forattini et al. 1997; Zavortink 1973
67	An. neivai		Aragão 1964; Deane et al. 1971; Zavortink 1973	Aragão 1964; Forattini 1961; Zavortink 1973; Deane et al. 1971; Póvoa et al. 2001

## Sheet: Natural Infection
		North States							Northeast States													Southeast States				South States				Legend
Map number	All Species	AC	AM	AP	PA	RO	RR	TO	AL	BA	CE	MA	PB	PE	PI	RN	SE	DF	GO	MT	MS	ES	MG	RJ	SP	PR	RS	SC
1	An. albertoi																													Plasmodium spp
2	An. albitarsis s.l.	Deane et al. 1948	Martins-Campos et al. 2012(P); Tadei & Thatcher 2000(E)	Póvoa et al. 2001(E)	Arruda et al. 1986(E, O, Sp); da Rocha et al. 2008(E); Deane et al. 1948(Sp)	Oliveira-Ferreira et al. 1990(E)	Barros et al. 2010(E); Silva-Vasconcelos et al. 2002(E)															Rezende et al. 2009(P-Ab)								P. vivax
3	An. antunesi																								Deane et al. 1971(Sp)			Deane et al. 1971(Sp)		P. falciparum
4	An. aquasalis			Deane et al. 1948(Sp)	Arruda et al. 1986(O), Deane et al. 1948(O, Sp)				Flores-Mendoza et al. 1996R		Deane et al. 1948(O, Sp)	Flores-Mendoza et al. 1996R	Deane et al. 1948			Flores-Mendoza et al. 1996R	Flores-Mendoza et al. 1996R							Flores-Mendoza et al. 1996R	Flores-Mendoza et al. 1996R					P. malariae
5	An. argyritarsis																													P.v + P.f
6	An. arthuri																													Pv + P. m
7	An. benarrochi	Deane et al. 1948				Deane et al. 1948																								Pf + Pm
8	An. braziliensis		Martins-Campos et al. 2012(P); Tadei & Thatcher 2000(E)	Póvoa et al. 2001(E)	Deane et al. 1948(Sp)	Oliveira-Ferreira et al. 1990(E)	Póvoa et al. 2006(E); Silva-Vasconcelos et al. 2002(E)						Deane et al. 1948																	Pv + Pf + P m
9	An. darlingi	Deane et al. 1948	Martins-Campos et al. 2012(P); Tadei & Thatcher 2000(E)	Conn et al. 2002(E,O, Sp); Deane et al. 1948(Sp); Galardo et al. 2007(E)	Arruda et al. 1986(E, O, Sp); da Rocha et al. 2008(E); Deane et al. 1948(O, Sp), Santos et al. 2009(E, O)	Angêlla et al. 2014 (P); Deane et al. 1948(O, Sp); Oliveira-Ferreira et al. 1990(E)	Póvoa et al. 2006(E); Silva-Vasconcelos et al. 2002(E)																							P. simium
10	An. deaneorum	Branquinho et al. 1993(E)																												P. brazilianum
11	An. dunhami																													P. s + P. br
12	An. evansae																													Tested but negative
13	An. galvaoi																					Rezende et al. 2009(P)			Laporta et al. 2015(P)
14	An. goeldii																													E = ELISA
15	An. guarani																													P = PCR
16	An. halophylus																													O = Oocystes
17	An. ininii																													Sp= Sporozoites
18	An. janconnae						Póvoa et al. 2006(E)
19	An. konderi																													Ab- only abdomen
20	An. lanei																								Senise & Sallum 2007					MB- monkey blood
21	An. lutzii																					Rezende et al. 2009(P-Ab)			Duarte et al. 2013(P)					R- revised by the author (references not available)
22	An. marajoara			Conn et al. 2002(E,O, Sp); Galardo et al. 2007(E)
23	An. nigritarsis
24	An. noroestensis												Deane et al. 1948
25	An. nunesztovari s.l.		Martins-Campos et al. 2012(P); Tadei & Thatcher 2000(E)	Galardo et al. 2007(E); Póvoa et al. 2001(E)	Arruda et al. 1986(E, O, Sp); da Rocha et al. 2008(P-ab)	Deane et al. 1948	Silva-Vasconcelos et al. 2002(E)
26	An. oryzalimnetes
27	An. oswaldoi s.l.	Branquinho et al. 1993(E)	Deane et al. 1971(Sp)	Póvoa et al. 2001(E)	Arruda et al. 1986(E, O); Santos et al. 2009(O)	Oliveira-Ferreira et al. 1990(E)
28	An. parvus																					Rezende et al. 2009(P)
29	An. pristinus
30	An. rangeli	Deane et al. 1948	Deane et al. 1948	Póvoa et al. 2001(E)		Deane et al. 1948
31	An. rondoni				da Rocha et al. 2008(E, P-ab)
32	An. sawyeri
33	An. strodei				da Rocha et al. 2008(P-Ab)	Oliveira-Ferreira et al. 1990(E)																Rezende et al. 2009(P-Ab)			Duarte et al. 2013(P); Laporta et al. 2015(P)
34	An. triannulatus s.l.	Deane et al. 1948	Tadei & Thatcher 2000(E)	Galardo et al. 2007(E); Póvoa et al. 2001(E)	Arruda et al. 1986(E, O, Sp); da Rocha et al. 2008(P-Ab)	Oliveira-Ferreira et al. 1990(E)							Deane et al. 1948												Duarte et al. 2013(P); Laporta et al. 2015(P)
35	An. kompi
36	An. nimbus				Deane et al. 1948	Deane et al. 1948
37	An. thomasi
38	An. gilesi
39	An. pseudotibiamaculatus
40	An. squamifemur
41	An. anchietai
42	An. bustamentei
43	An. costai
44	An. eiseni
45	An. evandroi
46	An. fluminensis																								Neves et al. 2013(P)
47	An. forattinii			Barbosa et al. 2016(P)*
48	An. intermedius			Galardo et al. 2007(E)	Santos et al. 2009(O)
49	An. maculipes																								Neves et al. 2013*(P)
50	An. mattogrossensis		Tadei & Thatcher 2000(E)		Deane et al. 1948	Deane et al. 1948
51	An. mediopunctatus	Deane et al. 1948	Tadei & Thatcher 2000(E)	Barbosa et al. 2016(P)*	Deane et al. 1948	Deane et al. 1948
52	An. minor
53	An. neomaculipalpus
54	An. peryassui		Tadei & Thatcher 2000(E)	Barbosa et al. 2016(P)	Deane et al. 1948	Deane et al. 1948	Silva-Vasconcelos et al. 2002(E)						Deane et al. 1948
55	An. pseudomaculipes																								Neves et al. 2013*(P)
56	An. pseudipunctipennis
57	An. punctimacula
58	An. ranchoui
59	An. shannoni		Deane et al. 1971(Sp)			Deane et al. 1948
60	An. tibiamaculatus
61	An. bambusicolus
62	An. bellator																							Carvalho & Rachou 1950		Amaral 1942(O); Coutinho et al. 1943(O)		Coutinho & Rachou, 1966(O,Sp); Rachou & Ferreira 1966(O,Sp)
63	An. boliviensis
64	An. cruzii																					Rezende et al. 2009(P)			Branquinho et al. 1997(E); Correa 1943 (O,Sp); Deane et al. 1966, 1970(MB), 1971(Sp); Neves et al. 2013(P); Duarte et al. 2013(P); Guimarães et al. 2012; Kirchgatter et al. 2014(P); Laporta et al. 2015(P)	Amaral 1942(O); Coutinho et al. 1943(O)		Coutinho et al. 1944(O); Coutinho & Rachou, 1966(O,Sp); Deane et al. 1971(Sp); Rachou & Ferreira 1966(O,Sp)
65	An. homunculus																					Rezende et al. 2009(P)						Rachou & Ferreira 1966(O,Sp)
66	An. laneanus
67	An. neivai		Deane et al. 1971(Sp)

## Sheet: Infected&Distribution
	Brazilian Regions	North							Northeast									Midwest				Southeast				South
Number	Species\States	AC	AM	AP	PA	RO	RR	TO	AL	BA	CE	MA	PB	PE	PI	RN	SE	DF	GO	MT	MS	ES	MG	RJ	SP	PR	RS	SC
1	An. albertoi
2	An. albitarsis s.l.	NP	VF	VFM	V	VF	VFM															V
3	An. antunesi																								NP			NP
4	An. aquasalis			ND	ND				ND		ND	ND	NP			ND	ND							ND	ND					Subgenus
5	An. argyritarsis
6	An. arthuri																													Nyssorhynchus
7	An. benarrochi	NP				NP																								Stethomyia
8	An. braziliensisS		VF	M	ND	VF	VF						NP																	Lophopodomyia
9	An. darlingi	NP	VF	VFM	VFM	VF	VF																							Anopheles
10	An. deaneorum	VF																												Kerteszia
11	An. dunhami
12	An. evansae
13	An. galvaoi																					V			F
14	An. goeldii																													Subtitle
15	An. guarani																													V: P. vivax
16	An. halophylus																													F: P. falciparum
17	An. ininii																													M: P. malariae
18	An. janconnae						VFM																							B: P. brasilianum
19	An. konderi																													S: P. simium
20	An. lanei																								NP					ND: Specie not determinated
21	An. lutzii																					V			V					NP: No parasite found
22	An. marajoara			VFM
23	An. nigritarsis
24	An. noroestensis												NP
25	An. nunesztovari s.l.		VFM	VFM	V	NP	V
26	An. oryzalimnetes
27	An. oswaldoi s.l.	VFM	NP	F	VF	F
28	An. parvus																					V
29	An. pristinus
30	An. rangeli	NP	NP	M		NP
31	An. rondoni				VF
32	An. sawyeri
33	An. strodei				ND	V																V			FM
34	An. triannulatus s.l.	NP	VFM	VFM	V	V							NP												VFM
35	An. kompi
36	An. nimbus				NP	NP
37	An. thomasi
38	An. gilesi
39	An. pseudotibiamaculatus
40	An. squamifemur
41	An. anchietai
42	An. bustamentei
43	An. costai
44	An. eiseni
45	An. evandroi
46	An. fluminensis																								M
47	An. forattinii			NP
48	An. intermedius			VFM	ND
49	An. maculipes																								VM
50	An. mattogrossensis		VF		NP	NP
51	An. mediopunctatus	NP	V	NP	NP	NP
52	An. minor
53	An. neomaculipalpus
54	An. peryassui		VF	NP	NP	NP	NP						NP
55	An. pseudomaculipes																								VM
56	An. pseudipunctipennis
57	An. punctimacula
58	An. ranchoui
59	An. shannoni		NP			NP
60	An. tibiamaculatus
61	An. bambusicolus
62	An. bellator																							ND		ND		ND
63	An. boliviensis
64	An. cruzii																					VF			VFMSB	ND		ND
65	An. homunchulus																					VF						ND
66	An. laneanus
67	An. neivai		ND
	Subgenus:	Nyssorhynchus				Stethomyia				Anopheles				Kerteszia				Lophopodomyia

## Sheet: References
References
1	Alencar J, de Mello VS, Serra-Freire NM, et al. Evaluation of Mosquito (Diptera: Culicidae) Species Richness using Two Sampling Methods in the Hydroelectric Reservoir of Simplício, Minas Gerais, Brazil. Zoological Science. 2012 2012/04/01;29(4):218-222. doi: 10.2108/zsj.29.218.
2	Alencar J, Morone F, Mello CFd, et al. Immature mosquitoes (Diptera: Culicidae) in a eutrophic landfill tank from State of Rio de Janeiro, Brazil. Revista da Sociedade Brasileira de Medicina Tropical. 2013;46:769-771.
3	Almeida F, Suesdek L, Motoki MT, et al. Morphometric comparisons of the scanning electron micrographs of the eggs of Anopheles (Nyssorhynchus) darlingi Root (Diptera: Culicidae). Acta Trop. 2014 Nov;139:115-22. doi: 10.1016/j.actatropica.2014.07.010. PubMed PMID: 25077432; eng.
4	Amaral J. Infecção natural de Nyssorhynchus (Kerteszia) cruzii e bellator (Diptera, Culicidae). A Folha Médica. 1942;XV e XXI:171.
5	Andrade RM BH. Contribuição para o conhecimento da fauna de anofelinos do estado do Espirito Santo: área de distribuição e incidência das espécies por cidades, vilas e povoados. . 9: 391–403. Rev Bras Malariol Doenças Trop. 1957;9(391-403).
6	Aragão MB. Distribuição geográfica e abundância das espécies de Anopheles (Kerteszia) (Diptera, Culicidae). Revista Brasileira de Malariologia e Doenças Tropicais. 1964;16(73-109).
7	Barbosa LM, Souto RN, Dos Anjos Ferreira RM, et al. Behavioral patterns, parity rate and natural infection analysis in anopheline species involved in the transmission of malaria in the northeastern Brazilian Amazon region. Acta Trop. 2016 Dec;164:216-225. doi: 10.1016/j.actatropica.2016.09.018. PubMed PMID: 27659096; eng.
8	Barbosa LMC, Souto RNP, Ferreira RMdA, et al. Composition, abundance and aspects of temporal variation in the distribution of Anopheles species in an area of Eastern Amazonia. Revista da Sociedade Brasileira de Medicina Tropical. 2014;47:313-320.
9	Barros FS, Vasconcelos SD, Arruda ME, et al. Tetrahymenidae infection in mosquito populations in a malaria-endemic region of the Amazon. Journal of invertebrate pathology. 2006 Mar;91(3):199-201. doi: 10.1016/j.jip.2006.01.001. PubMed PMID: 16497321; eng.
10	Barros FSM, Honório NA, Arruda ME. Mosquito Anthropophily: implications on malaria transmission in the northern Brazilian Amazon. Neotropical Entomology. 2010;39:1039-1043.
11	Bona ACD, Navarro-Silva MA. Paridade de Anopheles cruzii em Floresta Ombrófila Densa no Sul do Brasil. Revista de Saúde Pública. 2006;40:1118-1123.
12	Bourke BP, Foster PG, Bergo ES, et al. Phylogenetic relationships among species of Anopheles (Nyssorhynchus) (Diptera, Culicidae) based on nuclear and mitochondrial gene sequences. Acta Trop. 2010 May;114(2):88-96. doi: 10.1016/j.actatropica.2010.01.009. PubMed PMID: 20117069.
13	Bourke BP, Nagaki SS, Bergo ES, et al. Molecular phylogeny of the Myzorhynchella Section of Anopheles (Nyssorhynchus) (Diptera: Culicidae): genetic support for recently described and resurrected species. Memórias do Instituto Oswaldo Cruz. 2011;106:705-715.
14	Branquinho MS, Lagos CB, Rocha RM, et al. Anophelines in the state of Acre, Brazil, infected with Plasmodium falciparum, P. vivax, the variant P. vivax VK247 and P. malariae. Trans R Soc Trop Med Hyg. 1993 Jul-Aug;87(4):391-4. PubMed PMID: 8249059; eng.
15	Branquinho MS, Marrelli MT, Curado I, et al. Infecção de Anopheles (Kerteszia) cruzii por Plasmodium vivax e Plasmodium vivax variante VK247 nos municípios de São Vicente e Juquitiba, São Paulo. Rev Panam Salud Publica. 1997;2(3):189-193. doi: 10.1590/s1020-49891997000900004.
16	Calado DC, Foster PG, Bergo ES, et al. Resurrection of Anopheles goeldii from synonymy with Anopheles nuneztovari (Diptera, Culicidae) and a new record for Anopheles dunhami in the Brazilian Amazon. Mem Inst Oswaldo Cruz. 2008 Dec;103(8):791-9. PubMed PMID: 19148419.
17	Cardoso JdC, Bergo ES, Oliveira TMP, et al. New Records of Anopheles homunculus in Central and Serra Do Mar Biodiversity Corridors of the Atlantic Forest, Brazil. Journal of the American Mosquito Control Association. 2012 2012/03/01;28(1):1-5. doi: 10.2987/11-6205.1.
18	Cardoso JdC, Corseuil E, Barata JMS. Culicinae (Diptera, Culicidae) ocorrentes no Estado do Rio Grande do Sul, Brasil. Revista Brasileira de Entomologia. 2005;49:275-287.
19	Carréri-Bruno GC, Ciaravolo RMC, Pereira M. Malária adquirida durante atividade entomológica na Serra do Mar, região Sudeste do Brasil. Rev Saúde Pública 1995;29:142-143.
20	Carvalho FF, Rachou RG. Considerações sobre a malária no Estado do Rio de Janeiro com especial referência ao Vale do Rio Piraí. Rev Bras Malariol Doencas Trop. 1950;3:473-487.
21	Carvalho-Pinto CJ, Lourenço-de Oliveira R. Isoenzymatic analysis of four Anopheles (Kerteszia) bellator Dyar & Knab (Diptera: Culicidae) populations. Mem Inst Oswaldo Cruz. 2003;98(8):1045-1048. doi: 10.1590/s0074-02762003000800012.
22	Carvalho-Pinto CJ, Lourenço-de Oliveira R. Isoenzymatic analysis of four Anopheles (Kerteszia) cruzii (Diptera: Culicidae) populations of Brazil. Mem Inst Oswaldo Cruz. 2004;99(5):471-475.
23	Charlwood JD, Alecrim WA. Capture-recapture studies with the South American malaria vector Anopheles darlingi, Root. Ann Trop Med Parasitol. 1989 Dec;83(6):569-76. PubMed PMID: 2619371; eng.
24	Chaves LSM, Rodrigues de Sá IL, Bergamaschi DP, et al. Kerteszia Theobald (Diptera: Culicidae) mosquitoes and bromeliads: A landscape ecology approach regarding two species in the Atlantic rainforest. Acta tropica. 2016 2016/12//;164:303-313. doi: 10.1016/j.actatropica.2016.09.023. PubMed PMID: 27686960; eng.
25	Confalonieri UE, Costa Neto C. Diversity of mosquito vectors (Diptera: culicidae) in caxiuana, para, Brazil. Interdiscip Perspect Infect Dis. 2012;2012:741273. doi: 10.1155/2012/741273. PubMed PMID: 22997514; PubMed Central PMCID: PMCPMC3446658.
26	Conn JE. Systematics and population level analysis of Anopheles darlingi. Mem Inst Oswaldo Cruz. 1998 Sep-Oct;93(5):647-50. PubMed PMID: 9830532.
27	Conn JE, Wilkerson RC, Segura MNO, et al. Emergence of a new neotropical malaria vector facilitated by human migration and changes in land use. The American Journal of Tropical Medicine and Hygiene. 2002;66(1):18-22. doi: doi:https://doi.org/10.4269/ajtmh.2002.66.18.
28	Corrêa RR. Da infecção natural, pela Plasmodiose Malárica, do "anopheles (Kertszia) Cruzii" D. K. 1908. Folia Clinica et Biologica. 1943; XV(1):23-32.
29	Correa RR, Forattini OP, Guarita OF, et al. [Observations on the flight of Anopheles (Kerteszia) cruzii and of A. (K.) bellator, vectors of malaria (Diptera, Culicidae)]. Arq Hig Saude Publica. 1961 Dec;26:333-42. PubMed PMID: 13881451.
30	Coutinho JO, Rachou R. Data on the biology and the malaria vector capacity of anophelines of sub-group Kerteszia under natural conditions. Rev Bras Malariol Doencas Trop. 1966 Jul-Dec;18(3):557-580. PubMed PMID: 5998435.
31	Coutinho JO, Rachou R, Ferreira M. Considerações em tôrno de uma inspecção preliminar de malária em zona de alta endemicidade no Estado de Santa Catarina. Memórias do Instituto Oswaldo Cruz. 1944;41(1):1-19.
32	Coutinho JO, Rachou RG, Ricciardi I. Contribuição para o conhecimento dos transmissores de malária no Brasil - Anopheles (K) cruzii e bellator. Arq Hig. 1943;13.
33	da Rocha JA, de Oliveira SB, Povoa MM, et al. Malaria vectors in areas of Plasmodium falciparum epidemic transmission in the Amazon region, Brazil. Am J Trop Med Hyg. 2008 Jun;78(6):872-7. PubMed PMID: 18541762; eng.
34	da Silva Ade N, Fraiha-Neto H, dos Santos CC, et al. Anophelines in Belem, Para, Brazil: current and retrospective data. Cad Saude Publica. 2006 Aug;22(8):1575-1585. doi: /S0102-311x2006000800006. PubMed PMID: 16832529; por.
35	Dalla Bona AC, Navarro-Silva MA. Physiological age and longevity of Anopheles (Kerteszia) cruzii Dyar Knab (Diptera: Culicidae) in the Atlantic Forest of Southern Brazil. Neotropical Entomology. 2010;39:282-288.
36	de Arruda M, Carvalho MB, Nussenzweig RS, et al. Potential vectors of malaria and their different susceptibility to Plasmodium falciparum and Plasmodium vivax in northern Brazil identified by immunoassay. Am J Trop Med Hyg. 1986 Sep;35(5):873-81. PubMed PMID: 3532844; eng.
37	de Carvalho GC, Ceretti-Jr W, Natal D, et al. Occurrence of Anopheles (Anopheles) fluminensis root in the city of Sao Paulo, Brazil. J Vector Borne Dis. 2013 Mar;50(1):65-7. PubMed PMID: 23703443; eng.
38	Deane LM, Causey OR, Deane MP. Notas sobre a distribuição e a biologia dos anofelinos das Regiões Nordestina e Amazônica do Brasil. Rev Serv Esp Saúde Pública. 1948;1:827-965.
39	Deane LM, Deane MP, Ferreira Neto J. Studies on transmission of simian malaria and on a natural infection of man with Plasmodium simium in Brazil. Bull World Health Organ. 1966;35(5):805-8. PubMed PMID: 5297817; PubMed Central PMCID: PMCPMC2476224.
40	Deane LM, Deane MP, Ferreira Neto JA, et al. On the transmission of simian malaria in Brazil. Rev Inst Med Trop Sao Paulo. 1971 Sep-Oct;13(5):311-319. PubMed PMID: 5162258.
41	Deane LM, Ferreira Neto JA, Deane SP, et al. Anopheles (Kerteszia) cruzi, a natural vector of the monkey malaria parasites, Plasmodium simium and Plasmodium brasilianum. Trans R Soc Trop Med Hyg. 1970;64(4):647. PubMed PMID: 4991945.
42	dos Reis IC, Codeço CT, Degener CM, et al. Contribution of fish farming ponds to the production of immature Anopheles spp. in a malaria-endemic Amazonian town [journal article]. Malaria Journal. 2015;14(1):452. doi: 10.1186/s12936-015-0947-1.
43	dos Santos Silva J, Alencar J, Costa JM, et al. Feeding patterns of mosquitoes (Diptera: Culicidae) in six Brazilian environmental preservation areas. J Vector Ecol. 2012 Dec;37(2):342-350. doi: 10.1111/j.1948-7134.2012.00237.x. PubMed PMID: 23181858.
44	Duarte AM, Pereira DM, de Paula MB, et al. Natural infection in anopheline species and its implications for autochthonous malaria in the Atlantic Forest in Brazil. Parasit Vectors. 2013 Mar 07;6:58. doi: 10.1186/1756-3305-6-58. PubMed PMID: 23497493; PubMed Central PMCID: PMCPMC3605261. eng.
45	Emerson KJ, Conn JE, Bergo ES, et al. Brazilian Anopheles darlingi Root (Diptera: Culicidae) Clusters by Major Biogeographical Region. PLoS One. 2015;10(7):e0130773. doi: 10.1371/journal.pone.0130773. PubMed PMID: 26172559; PubMed Central PMCID: PMCPMC4501553. eng.
46	Fairley TL, Povoa MM, Conn JE. Evaluation of the Amazon River delta as a barrier to gene flow for the regional malaria vector, Anopheles aquasalis (Diptera: Culicidae) in northeastern Brazil. J Med Entomol. 2002 Nov;39(6):861-9. PubMed PMID: 12495184; eng.
47	Flores-Mendoza C, Cunha RA, Rocha DS, et al. Determinação das fontes alimentares de Anopheles aquasalis (Diptera: Culicidae) no Estado do Rio de Janeiro, Brasil, pelo teste de precipitina. Revista de Saúde Pública. 1996;30:129-134.
48	Flores-Mendoza C, Lourenço-de-Oliveira R. Bionomics of Anopheles aquasalis Curry 1932, in Guaraí, state of Rio de Janeiro, southeastern Brazil: I. Seasonal distribution and parity rates. Memórias do Instituto Oswaldo Cruz. 1996;91:265-270.
49	Forattini OP. [Arborvirus infections]. Arq Fac Hig Saude Publica Univ Sao Paulo. 1961;15-16:109-99. PubMed PMID: 13958674.
50	Forattini OP. Exophilic behavior of Anopheles darlingi Root in a Southern Region of Brazil. Revista de Saúde Pública. 1987;21:291-304.
51	Forattini OP, Alves AC, Natal D, et al. Observações sobre atividade de mosquitos Culicidae em mata primitiva da encosta no Vale do Ribeira, São Paulo, Brasil. Rev Saude Publica. 1986;20(1):1-20. doi: 10.1590/s0034-89101986000100001.
52	Forattini OP, Correa RR, Rabello EX, et al. [Some observations on the density of Kerteszia anophelines in the state of Sao Paulo, Brazil]. Arq Hig Saude Publica. 1961 Sep;26:249-56. PubMed PMID: 13893988.
53	Forattini OP, Gomes AC, Natal D, et al. Observações sobre atividade de mosquitos Culicidae em matas primitivas da planície e perfis epidemiológicos de vários ambientes no Vale do Ribeira, São Paulo, Brasil. Rev Saude Publica. 1986;20(3):178-203.
54	Forattini OP, Kakitani I, dos Santos RC, et al. [The synanthropic potential of Kerteszia and Culex mosquitoes (Diptera:Culicidae) in Southeastern Brazil]. Rev Saude Publica. 2000 Dec;34(6):565-569. PubMed PMID: 11175599.
55	Forattini OP, Kakitani I, Marques GR, et al. [Immature forms of anophelines in artificial containers]. Rev Saude Publica. 1998 Apr;32(2):189-91. PubMed PMID: 9713127.
56	Forattini OP, Kakitani I, Massad E, et al. Studies on mosquitoes (Diptera: Culicidae) and anthropic environment. 1--Parity of blood seeking Anopheles (Kerteszia) in south-eastern Brazil. Rev Saude Publica. 1993 Feb;27(1):1-8. PubMed PMID: 8310263.
57	Forattini OP, Kakitani I, Massad E, et al. Studies on mosquitoes (Diptera: Culicidae) and anthropic environment: 7- Behaviour of adults Nyssorhynchus anophelines with special reference to Anopheles albitarsis s.l. in South-Eastern Brazil. Revista de Saúde Pública. 1995;29:20-26.
58	Forattini OP, Kakitani I, Massad E, et al. Studies on mosquitoes (Diptera: Culicidae) and anthropic environment. 11--Biting activity and blood-seeking parity of Anopheles (Kerteszia) in south-eastern Brazil. Rev Saude Publica. 1996 Apr;30(2):107-14. PubMed PMID: 9077008.
59	Forattini OP, Kakitani I, Santos RL, et al. Role of Anopheles (Kerteszia) bellator as malaria vector in southeastern Brazil (Diptera: Culicidae). Mem Inst Oswaldo Cruz. 1999 Nov-Dec;94(6):715-8. PubMed PMID: 10585643.
60	Forattini OP, Sallum MA, Flores DC. Description of the egg of Anopheles (Anopheles) intermedius (Peryassu, 1908) (Diptera: Culicidae) by scanning electron microscopy. Rev Inst Med Trop Sao Paulo. 1997 Jan-Feb;39(1):5-9. PubMed PMID: 9394529.
61	Foster PG, Bergo ES, Bourke BP, et al. Phylogenetic Analysis and DNA-based Species Confirmation in Anopheles (Nyssorhynchus). PLoS ONE. 2013;8(2):e54063. doi: 10.1371/journal.pone.0054063. PubMed PMID: PMC3563636.
62	Galardo AK, Arruda M, D'Almeida Couto AA, et al. Malaria vector incrimination in three rural riverine villages in the Brazilian Amazon. Am J Trop Med Hyg. 2007 Mar;76(3):461-9. PubMed PMID: 17360868; eng.
63	Gil LHS, Rodrigues MdS, Lima AAd, et al. Seasonal Distribution of Malaria Vectors (Diptera: Culicidae) in Rural Localities of Porto Velho, Rondônia, Brazilian Amazon. Revista do Instituto de Medicina Tropical de São Paulo. 2015;57:263-267.
64	Gil LHS, Tada MS, Katsuragawa TH, et al. Urban and suburban malaria in Rondônia (Brazilian Western Amazon) II: perennial transmissions with high anopheline densities are associated with human environmental changes. Memórias do Instituto Oswaldo Cruz. 2007;102:271-276.
65	Gomes AdC, Forattini OP, Natal D. Composição e atividade de mosquitos Culicidae. Emprego de armadilha CDC no Vale do Ribeira, Estado de São Paulo, Brasil. Revista de Saúde Pública. 1987;21:363-370.
66	Gomes AdC, Paula MBd, Natal D, et al. Effects of flooding of the River Paraná on the temporal activity of Anopheles (Nyssorhynchus) darlingi Root (Diptera: Culicidae), at the border state of Mato Grosso do Sul and São Paulo, Brazil. Revista da Sociedade Brasileira de Medicina Tropical. 2010;43:516-522.
67	Gomes Ade C, Paula MB, Natal D, et al. [Ecology of Anopheles (Nyssorhynchus) darlingi Root in the installation area of a hydroelectric scheme on the border between the States of Mato Grosso do Sul and Sao Paulo]. Rev Soc Bras Med Trop. 2010 May-Jun;43(3):272-6. PubMed PMID: 20563495; por.
68	Guedes MLP, Navarro-Silva MA. Mosquito community composition in dynamic landscapes from the Atlantic Forest biome (Diptera, Culicidae). Revista Brasileira de Entomologia. 2014;58:88-94.
69	Guimarães AÉ, Arlé M. Mosquitos no Parque Nacional da Serra dos Órgãos, estado do Rio de Janeiro, Brasil: I- distribuição estacional. Memórias do Instituto Oswaldo Cruz. 1984;79:309-323.
70	Guimarães AE, Arlé M, Machado RNM. Mosquitos no Parque Nacional da Serra dos Orgãos, Estado do Rio de Janeiro, Brasil: II. Distribuição vertical. Memórias do Instituto Oswaldo Cruz. 1985;80:171-185.
71	Guimaraes AE, de Mello RP, Lopes CM, et al. [Prevalence of Anophelines (Diptera: Culicidae) during sunset in areas of the Itaipu Hydroelectric plant in Guaira county, state of Parana, Brazil]. Mem Inst Oswaldo Cruz. 1997 Nov-Dec;92(6):745-54. PubMed PMID: 9580488.
72	Guimaraes AE, Gentile C, Alencar J, et al. Ecology of Anopheline (Diptera, Culicidae), malaria vectors around the Serra da Mesa Reservoir, State of Goias, Brazil. 1--Frequency and climatic factors. Cad Saude Publica. 2004 Jan-Feb;20(1):291-302. PubMed PMID: 15029332.
73	Guimaraes AE, Gentile C, Lopes CM, et al. [Ecology of mosquitoes in areas of the National Park of "Serra da Bocaina", Brazil: II - Monthly frequency and climatic factors]. Rev Saude Publica. 2001 Aug;35(4):392-9. PubMed PMID: 11600930.
74	Guimarães AE, Gentile C, Lopes CM, et al. Ecology of mosquitoes (Diptera: Culicidae) in areas of Serra da Bocaina National Park, Brazil. I. Habitat distribution. Rev Saude Publica. 2000;34:242-250. doi: 10.1590/s0034-89102000000300006.
75	Guimaraes AE, Lopes CM, de Mello RP, et al. Mosquito (Diptera, Culicidae) ecology in the Iguacu National Park, Brazil: 1 Habitat distribution. Cad Saude Publica. 2003 Jul-Aug;19(4):1107-1116. PubMed PMID: 12973575.
76	Guimarães AÉ, Victório VMN. Mosquitos no Parque Nacional da Serra dos Orgãos, Estado do Rio de Janeiro, Brasil: III. Preferência horária para hematofagia. Memórias do Instituto Oswaldo Cruz. 1986;81:93-103.
77	Guimaraes LO, Bajay MM, Wunderlich G, et al. The genetic diversity of Plasmodium malariae and Plasmodium brasilianum from human, simian and mosquito hosts in Brazil. Acta Trop. 2012 Oct;124(1):27-32. doi: 10.1016/j.actatropica.2012.05.016. PubMed PMID: 22705349; eng.
78	Kakitani I, Ueno HM, Forattini OP. Paridade e influência do vento sobre a freqüência de Anopheles marajoara, São Paulo. Revista de Saúde Pública. 2003;37:280-284.
79	Kirchgatter K, Tubaki RM, Malafronte RdS, et al. Anopheles (Kerteszia) cruzii (DIPTERA: CULICIDAE) IN PERIDOMICILIARY AREA DURING ASYMPTOMATIC MALARIA TRANSMISSION IN THE ATLANTIC FOREST: MOLECULAR IDENTIFICATION OF BLOOD-MEAL SOURCES INDICATES HUMANS AS PRIMARY INTERMEDIATE HOSTS. Revista do Instituto de Medicina Tropical de São Paulo. 2014;56(5):403-409. doi: 10.1590/S0036-46652014000500006. Pu…
80	Klein TA, Lima JBP, Tang AT. Biting behavior of Anopheles mosquitoes in Costa Marques, Rondonia, Brazil. Revista da Sociedade Brasileira de Medicina Tropical. 1991;24:13-20.
81	Laporta GZ, Burattini MN, Levy D, et al. Plasmodium falciparum in the southeastern Atlantic forest: a challenge to the bromeliad-malaria paradigm? [journal article]. Malaria Journal. 2015;14(1):181. doi: 10.1186/s12936-015-0680-9.
82	Laporta GZ, Ramos DG, Ribeiro MC, et al. Habitat suitability of Anopheles vector species and association with human malaria in the Atlantic Forest in south-eastern Brazil. Memórias do Instituto Oswaldo Cruz. 2011;106:239-245.
83	Lehr MA, Kilpatrick CW, Wilkerson RC, et al. Cryptic Species in the Anopheles (Nyssorhynchus) albitarsis (Diptera: Culicidae) Complex: Incongruence Between Random Amplified Polymorphic DNA-Polymerase Chain Reaction Identification and Analysis of Mitochondrial DNA COI Gene Sequences. Annals of the Entomological Society of America. 2005;98(6):908-917. doi: 10.1603/0013-8746(2005)098[0908:CSITAN]2.0…
84	Li C, Wilkerson RC. Identification of Anopheles (Nyssorhynchus) albitarsis complex species (Diptera: Culicidae) using rDNA internal transcribed spacer 2-based polymerase chain reaction primes. Memórias do Instituto Oswaldo Cruz. 2005;100:495-500.
85	Lima JB, Valle D, Peixoto AA. Analysis of reproductive isolation between sibling species anopheles Albitarsis sensu stricto and Anopheles deaneorum, two malaria vectors belonging to the Albitarsis complex (Diptera: Culicidae). J Med Entomol. 2004 Sep;41(5):888-93. PubMed PMID: 15535617.
86	Limongi JE, Chaves KM, Paula MBCd, et al. Malaria outbreaks in a non-endemic area of Brazil, 2005. Revista da Sociedade Brasileira de Medicina Tropical. 2008;41:232-237.
87	Lorenz C, Marques TC, Sallum MAM, et al. Altitudinal population structure and microevolution of the malaria vector Anopheles cruzii (Diptera: Culicidae) [journal article]. Parasites & Vectors. 2014;7(1):581. doi: 10.1186/s13071-014-0581-8.
88	Lorosa ES, Faria MS, de Oliveira LC, et al. Blood meal identification of selected mosquitoes in Rio de Janeiro, Brazil. J Am Mosq Control Assoc. 2010 Mar;26(1):18-23. doi: 10.2987/09-5914.1. PubMed PMID: 20402346; eng.
89	Lounibos LP, Duzak D, Linley JR. Comparative egg morphology of six species of the Albimanus section of Anopheles (Nyssorhynchus) (Diptera:Culicidae). J Med Entomol. 1997 Mar;34(2):136-55. PubMed PMID: 9103756.
90	Lourenço-de-Oliveira R, Guimarães AEdG, Arlé M, et al. Anopheline species, some of their habits and relation to malaria in endemic areas of Rondônia State, Amazon region of Brazil. Memórias do Instituto Oswaldo Cruz. 1989;84:501-514.
91	Lourenço-de-Oliveira R, Luz SL. Simian malaria at two sites in the Brazilian Amazon - II: Vertical distribution and frequency of anopheline species inside and outside the forest. Memórias do Instituto Oswaldo Cruz. 1996;91:687-694.
92	Lutz A. Waldmosquitos und waldmalaria. Centralbl Bakt. 1903;33.
93	Marcondes CB, Paterno U. Preliminary evidence of association between species of mosquitoes in Atlantic forest of Santa Catarina State, (Diptera: Culicidae). Revista da Sociedade Brasileira de Medicina Tropical. 2005;38:75-76.
94	Marques GR, Condino ML, Serpa LL, et al. [Epidemiological aspects of autochthonous malaria in the Atlantic forest area of the northern coast of the State of Sao Paulo, 1985-2006]. Rev Soc Bras Med Trop. 2008 Jul-Aug;41(4):386-389. PubMed PMID: 18853012.
95	Marques TC, Bourke BP, Laporta GZ, et al. Mosquito (Diptera: Culicidae) assemblages associated with Nidularium and Vriesea bromeliads in Serra do Mar, Atlantic Forest, Brazil. Parasit Vectors. 2012 Feb 16;5:41. doi: 10.1186/1756-3305-5-41. PubMed PMID: 22340486; PubMed Central PMCID: PMCPMC3359275. eng.
96	Marrelli MT, Floeter-Winter LM, Malafronte RS, et al. Amazonian malaria vector anopheline relationships interpreted from ITS2 rDNA sequences. Med Vet Entomol. 2005 Jun;19(2):208-18. doi: 10.1111/j.0269-283X.2005.00558.x. PubMed PMID: 15958027; eng.
97	Marrelli MT, Malafronte RS, Flores-Mendoza C, et al. Sequence Analysis of the Second Internal Transcribed Spacer of Ribosomal DNA in Anopheles oswaldoi (Diptera: Culicidae). Journal of Medical Entomology. 1999;36(6):679-684. doi: 10.1093/jmedent/36.6.679.
98	Marteis LS, Sallum MA, Natal D, et al. First Record of Anopheles oryzalimnetes, Anopheles argyritarsis, and Anopheles sawyeri (Diptera: Culicidae) in the Caatinga Biome, Semiarid Scrubland of Sergipe State, Brazil. J Med Entomol. 2015 Sep;52(5):858-65. doi: 10.1093/jme/tjv118. PubMed PMID: 26336257.
99	Martins-Campos KM, Pinheiro WD, Vítor-Silva S, et al. Integrated vector management targeting Anopheles darlingi populations decreases malaria incidence in an unstable transmission area, in the rural Brazilian Amazon [journal article]. Malaria Journal. 2012;11(1):351. doi: 10.1186/1475-2875-11-351.
100	McKeon SN, Schlichting CD, Povoa MM, et al. Ecological suitability and spatial distribution of five Anopheles species in Amazonian Brazil. Am J Trop Med Hyg. 2013 Jun;88(6):1079-86. doi: 10.4269/ajtmh.12-0203. PubMed PMID: 23546804; PubMed Central PMCID: PMCPMC3752806.
101	Melandri V, Alencar J, Guimaraes AE. The influence of the area of the Serra da Mesa Hydroelectric Plant, State of Goias, on the frequency and diversity of anophelines (Diptera: Culicidae): a study on the effect of a reservoir. Rev Soc Bras Med Trop. 2015 Jan-Feb;48(1):33-8. doi: 10.1590/0037-8682-0225-2014. PubMed PMID: 25860461.
102	Meneguzzi VC, Santos CBd, Pinto IdS, et al. Use of geoprocessing to define malaria risk areas and evaluation of the vectorial importance of anopheline mosquitoes (Diptera: Culicidae) in Espírito Santo, Brazil. Memórias do Instituto Oswaldo Cruz. 2009;104:570-575.
103	Mirabello L, Conn JE. Population analysis using the nuclear white gene detects Pliocene/Pleistocene lineage divergence within Anopheles nuneztovari in South America. Med Vet Entomol. 2008 Jun;22(2):109-19. doi: 10.1111/j.1365-2915.2008.00731.x. PubMed PMID: 18498609; eng.
104	Missawa NA, Ribeiro ALM, Maciel GBML, et al. Comparison of capture methods for the diagnosis of adult anopheline populations from State of Mato Grosso, Brazil. Revista da Sociedade Brasileira de Medicina Tropical. 2011;44:555-560.
105	Morais SA, Urbinatti PR, Sallum MAM, et al. Brazilian mosquito (Diptera: Culicidae) fauna: I. Anopheles species from Porto Velho, Rondônia state, western Amazon, Brazil. Revista do Instituto de Medicina Tropical de São Paulo. 2012;54:331-335.
106	Moroni RB, Maia JdF, Tadei WP, et al. Genetic variability among Anopheles species belonging to the Nyssorhynchus and Anopheles subgenera in the Amazon region. Revista da Sociedade Brasileira de Medicina Tropical. 2010;43:409-415.
107	Motoki MT, Bourke BP, Bergo ES, et al. Systematic notes of Anopheles konderi and its first record in Parana State, Brazil. J Am Mosq Control Assoc. 2011 Sep;27(3):191-200. doi: 10.2987/10-6094.1. PubMed PMID: 22017082; eng.
108	Motoki MT, Suesdek L, Bergo ES, et al. Wing geometry of Anopheles darlingi Root (Diptera: Culicidae) in five major Brazilian ecoregions. Infection, Genetics and Evolution. 2012 8//;12(6):1246-1252. doi: http://doi.org/10.1016/j.meegid.2012.04.002.
109	Motoki MT, Wilkerson RC, Sallum MA. The Anopheles albitarsis complex with the recognition of Anopheles oryzalimnetes Wilkerson and Motoki, n. sp. and Anopheles janconnae Wilkerson and Sallum, n. sp. (Diptera: Culicidae). Mem Inst Oswaldo Cruz. 2009 Sep;104(6):823-50. PubMed PMID: 19876554; eng.
110	Moutinho PR, Gil LH, Cruz RB, et al. Population dynamics, structure and behavior of Anopheles darlingi in a rural settlement in the Amazon rainforest of Acre, Brazil. Malar J. 2011 Jun 24;10:174. doi: 10.1186/1475-2875-10-174. PubMed PMID: 21702964; PubMed Central PMCID: PMCPMC3146439. eng.
111	Nagaki SS, Da Silva AM, Sallum MAM. Redescription of Anopheles (Nyssorhynchus) lutzii, and Resurrection of Anopheles guarani from Synonymy with an. lutzii (Diptera: Culicidae). Annals of the Entomological Society of America. 2011;104(3):374-388. doi: 10.1603/AN10126.
112	Nagaki SS, Motta Mde A, Sallum MA. Redescription of Anopheles (Nyssorhynchus) antunesi Galvao & Amaral and description of a new species of the Myzorhynchella Section (Diptera: Culicidae) from Serra da Mantiqueira, Brazil. Mem Inst Oswaldo Cruz. 2010 May;105(3):278-85. PubMed PMID: 20512240.
113	Nagm L, Luitgards-Moura JF, Neucamp Cde S, et al. Affinity and diversity indices for anopheline immature forms. Rev Inst Med Trop Sao Paulo. 2007 Sep-Oct;49(5):309-16. PubMed PMID: 18026638.
114	Natal D, Urbinatti PR, Malafronte RdS, et al. First record of Anopheles (Anopheles) costai Fonseca & Ramos, 1939 in Espírito Santo State, Brazil. Revista do Instituto de Medicina Tropical de São Paulo. 2007;49:323-326.
115	Neves A, Urbinatti PR, Malafronte Rdos S, et al. Malaria outside the Amazon region: natural Plasmodium infection in anophelines collected near an indigenous village in the Vale do Rio Branco, Itanhaem, SP, Brazil. Acta Trop. 2013 Jan;125(1):102-6. doi: 10.1016/j.actatropica.2012.08.014. PubMed PMID: 22989665.
116	Oliveira-Ferreira Jd, Lourenco-de-Oliveira R, Teva A, et al. Natural malaria infections in anophelines in Rondonia State, Brazilian Amazon. Am J Trop Med Hyg. 1990 Jul;43(1):6-10. PubMed PMID: 2200290; eng.
117	Pedro PM, Uezu A, Sallum MA. Concordant phylogeographies of 2 malaria vectors attest to common spatial and demographic histories. The Journal of heredity. 2010 Sep-Oct;101(5):618-27. doi: 10.1093/jhered/esq054. PubMed PMID: 20511380; eng.
118	Portes MdGT, Rossi JCN, Nascimento JCd, et al. Anofelinos de Santa Catarina (Diptera: Culicidae), Brasil. Revista da Sociedade Brasileira de Medicina Tropical. 2010;43:156-160.
119	Póvoa MM, Souza RTLd, Lacerda RNdL, et al. The importance of Anopheles albitarsis E and An. darlingi in human malaria transmission in Boa Vista, state of Roraima, Brazil. Memórias do Instituto Oswaldo Cruz. 2006;101:163-168.
120	Póvoa MM, Wirtz RA, Lacerda RNL, et al. Malaria vectors in the municipality of Serra do Navio, State of Amapá, Amazon Region, Brazil. Memórias do Instituto Oswaldo Cruz. 2001;96:179-184.
121	Rachou RG. [Infectibility of anophelines of the subgenus Kerteszia by human malaria parasites]. Rev Bras Malariol Doencas Trop. 1966 Jul-Dec;18(3):595-602. PubMed PMID: 5998438.
122	Rachou RG, Ferreira MO. Kerteszia as the group most responsible for malaria in the State of Santa Catarina. Rev Bras Malariol Doencas Trop. 1966 Jul-Dec;18(3):691-697. PubMed PMID: 5998444.
123	Rafael MS, Jr IPS, Tadei WP, et al. Cytogenetic study of Anopheles albitarsis (Diptera: Culicidae) by C‐banding and in situ hybridization. Hereditas. 2006;143(2006):62-67. doi: doi:10.1111/j.2006.0018-0661.01926.x.
124	Rebelo JM, Moraes JL, Alves GA, et al. [Distribution of species from genus Anopheles (Diptera, Culicidae) in the State of Maranhao, Brazil]. Cad Saude Publica. 2007 Dec;23(12):2959-71. PubMed PMID: 18157338.
125	Rezende HR, Falqueto A, Urbinatti PR, et al. Comparative study of distribution of anopheline vectors (Diptera: Culicidae) in areas with and without malaria transmission in the highlands of an extra-Amazonian region in Brazil. J Med Entomol. 2013 May;50(3):598-602. PubMed PMID: 23802455; eng.
126	Rezende HR, Soares RM, Cerutti C, Jr., et al. Entomological characterization and natural infection of anophelines in an area of the Atlantic Forest with autochthonous malaria cases in mountainous region of Espirito Santo State, Brazil. Neotropical Entomology. 2009 Mar-Apr;38(2):272-280. PubMed PMID: 19488519; eng.
127	Ribeiro ALM, Miyazaki RD, Rodrigues JSV, et al. Parity and influence of abiotic factors on Anopheles in the Manso dam, State of Mato Grosso, Brazil. Revista da Sociedade Brasileira de Medicina Tropical. 2013;46:498-501.
128	Rios-Velásquez CM, Martins-Campos KM, Simões RC, et al. Experimental Plasmodium vivax infection of key Anopheles species from the Brazilian Amazon [journal article]. Malaria Journal. 2013;12(1):460. doi: 10.1186/1475-2875-12-460.
129	Rodrigues MS, Silva IM, Leal LB, et al. Development of a New Mosquito Retention System for the BG-Malaria Trap To Reduce The Damage To Mosquitoes. Journal of the American Mosquito Control Association. 2014 2014/09/01;30(3):184-190. doi: 10.2987/14-6423R.1.
130	Rona LDP, Carvalho-Pinto CJ, Gentile C, et al. Assessing the molecular divergence between Anopheles (Kerteszia) cruzii populations from Brazil using the timeless gene: further evidence of a species complex. Malaria Journal. 2009;8:60-60. doi: 10.1186/1475-2875-8-60. PubMed PMID: PMC2673228.
131	Ruiz-Lopez F, Wilkerson RC, Conn JE, et al. DNA barcoding reveals both known and novel taxa in the Albitarsis Group (Anopheles: Nyssorhynchus) of Neotropical malaria vectors. Parasites & Vectors. 2012;5:44-44. doi: 10.1186/1756-3305-5-44. PubMed PMID: PMC3350407.
132	Ruiz-Lopez F, Wilkerson RC, Ponsonby DJ, et al. Systematics of the oswaldoi complex (Anopheles, Nyssorhynchus) in South America. Parasit Vectors. 2013 Nov 12;6(1):324. doi: 10.1186/1756-3305-6-324. PubMed PMID: 24499562; PubMed Central PMCID: PMCPMC3843595.
133	Sallum MAM, Bergo ES, Flores DC, et al. Systematic studies on Anopheles galvaoi Causey, Deane & Deane from the subgenus Nysssorhynchus blanchard (Diptera: Culicidae). Memórias do Instituto Oswaldo Cruz. 2002;97:1177-1189.
134	Santos CF, Silva AC, Rodrigues RA, et al. Inventory of mosquitoes (Diptera: Culicidae) in conservation units in Brazilian tropical dry forest. Revista do Instituto de Medicina Tropical de São Paulo. 2015;57:227-232.
135	Santos JMMd, Maia JdF, Tadei WP, et al. Isoenzymatic variability among five Anopheles species belonging to the Nyssorhynchus and Anopheles subgenera of the Amazon region, Brazil. Memórias do Instituto Oswaldo Cruz. 2003;98:247-254.
136	Santos RL, Forattini OP, Burattini MN. Laboratory and field observations on duration of gonotrophic cycle of Anopheles albitarsis s.l. (Diptera: Culicidae) in southeastern Brazil. J Med Entomol. 2002;39. doi: 10.1603/0022-2585-39.6.926.
137	Santos RL, Padilha A, Costa MD, et al. Malaria vectors in two indigenous reserves of the Brazilian Amazon. Rev Saude Publica. 2009 Oct;43(5):859-68. PubMed PMID: 19851633.
138	Scarpassa VM, Conn JE. Molecular differentiation in natural populations of Anopheles oswaldoi sensu lato (Diptera: Culicidae) from the Brazilian Amazon, using sequences of the COI gene from mitochondrial DNA. Genet Mol Res. 2006 Aug 31;5(3):493-502. PubMed PMID: 17117365.
139	Scarpassa VM, Conn JE. Mitochondrial DNA Detects a Complex Evolutionary History with Pleistocene Epoch Divergence for the Neotropical Malaria Vector Anopheles nuneztovari Sensu Lato. The American Journal of Tropical Medicine and Hygiene. 2011;85(5):857-867. doi: 10.4269/ajtmh.2011.11-0150. PubMed PMID: PMC3205631.
140	Senise LV, Sallum MA. Systematics of Anopheles lanei Galvao and Amaral, a species of the subgenus Nyssorhynchus Blanchard (Diptera: Culicidae). Mem Inst Oswaldo Cruz. 2007 Dec;102(8):959-67. PubMed PMID: 18209935.
141	Silva JdS, Acel AM, Guimarães AÉ, et al. Encontro de larvas de Anopheles (Nyssorhynchus) argyritarsis em criadouros artificiais no Estado de Mato Grosso. Revista da Sociedade Brasileira de Medicina Tropical. 2008;41:313-314.
142	Silva JdS, Souto Couri M, de Leão Giupponi AP, et al. Mosquito fauna of the Guapiaçu Ecological Reserve, Cachoeiras de Macacu, Rio de Janeiro, Brazil, collected under the influence of different color CDC light traps. Journal of Vector Ecology. 2014;39(2):384-394. doi: 10.1111/jvec.12114.
143	Silva-do-Nascimento TF, Pitaluga LDR, Peixoto AA, et al. Molecular divergence in the timeless and cpr genes among three sympatric cryptic species of the Anopheles triannulatus complex. Memórias do Instituto Oswaldo Cruz. 2011;106:218-222.
144	Silva-Vasconcelos Ad, Kato MY, Mourao EN, et al. Biting indices, host-seeking activity and natural infection rates of anopheline species in Boa Vista, Roraima, Brazil from 1996 to 1998. Mem Inst Oswaldo Cruz. 2002 Mar;97(2):151-61. PubMed PMID: 12016435.
145	Souza-Santos R. Seasonal distribution of malaria vectors in Machadinho d'Oeste, Rondonia State, Amazon Region, Brazil. Cad Saude Publica. 2002 Nov-Dec;18(6):1813-1818. PubMed PMID: 12488912.
146	Tadei WP, Dutary Thatcher B. Malaria vectors in the Brazilian amazon: Anopheles of the subgenus Nyssorhynchus. Rev Inst Med Trop Sao Paulo. 2000 Mar-Apr;42(2):87-94. PubMed PMID: 10810323; eng.
147	Trindade DB, Scarpassa VM. Genetic differentiation and diagnostic loci among Anopheles (Nyssorhynchus) rangeli, An. (Nys.) nuneztovari, and An. (Nys.) dunhami (Diptera: Culicidae) in the Brazilian Amazon. J Med Entomol. 2002 Jul;39(4):613-20. PubMed PMID: 12144292.
148	Tubaki RM, Menezes RMTd, Cardoso Junior RP, et al. Studies on entomological monitoring: mosquito species frequency in riverine habitats of the Igarapava Dam, Southern Region, Brazil. Revista do Instituto de Medicina Tropical de São Paulo. 2004;46:223-229.
149	Ueno HM, Forattini OP, Kakitani I. Distribuição vertical e sazonal de Anopheles (Kerteszia) em Ilha Comprida, SP. Revista de Saúde Pública. 2007;41:269-275.
150	Veloso HP, Moura JV, Klein RM. Delimitação ecológica dos anofelinos no subgênero Kerteszia na região costeira do sul do Brasil. Mem Inst Oswaldo Cruz. 1956;54:517-541.
151	Voorham J. Intra-population plasticity of Anopheles darlingi's (Diptera, Culicidae) biting activity patterns in the state of Amapa, Brazil. Rev Saude Publica. 2002 Feb;36(1):75-80. PubMed PMID: 11887233; eng.
152	Wermelinger ED, Benigno CV, Machado RN, et al. Mosquito population dynamic (Diptera: Culicidae) in a eutrophised dam. Braz J Biol. 2012 Nov;72(4):795-9. PubMed PMID: 23295506.
153	Wilkerson RC, Gaffigan TV, Lima JB. Identification of species related to Anopheles (Nyssorhynchus) albitarsis by random amplified polymorphic DNA-Polymerase chain reaction (Diptera: Culicidae). Memórias do Instituto Oswaldo Cruz. 1995;90:721-732.
154	Wilkerson RC, Hribar LJ, Milstrey EG, et al. The identification of Anopheles (Nyssorhynchus) rondoni (Diptera; Culicidae) in Mato Grosso, Brazil; an analysis of key character variability.pdf>. Mem Inst Oswaldo Cruz. 1995;90(5):575-582.
155	Wilkerson RC, Peyton EL. The Brazilian Malaria Vector Anopheles (Kerteszia) Cruzii: Life Stages and Biology (Diptera: Culicidae). Vol. 23. Mosquito Systematics; 1991.
156	Xavier MMdS, Rebêlo JM. Espécies de Anopheles (Culicidae, Anophelinae) em área endêmica de malária, Maranhão, Brasil. Revista de Saúde Pública. 1999;33:535-541.
157	Zavortink TJ. Mosquito studies (Diptera: Culicidae) XXIX. A review of the subgenus Kerteszia of Anopheles. Contributions of the American Entomological Institute. 1973;9:1-54.
158	Zimmerman RH, Galardo AK, Lounibos LP, et al. Bloodmeal hosts of Anopheles species (Diptera: Culicidae) in a malaria-endemic area of the Brazilian Amazon. J Med Entomol. 2006 Sep;43(5):947-56. PubMed PMID: 17017232; eng.
159	Zimmerman RH, Lounibos LP, Nishimura N, et al. Nightly biting cycles of malaria vectors in a heterogeneous transmission area of eastern Amazonian Brazil. Malar J. 2013 Jul 26;12:262. doi: 10.1186/1475-2875-12-262. PubMed PMID: 23890413; PubMed Central PMCID: PMCPMC3729824. eng.
